# Supplementary material for: Bad air quality raises mortality in honey bees, a concern for all pollinators
Source: Research Square preprint supplement (doi:10.21203/rs.3.rs-3760367/v1), 2024-01-18
Supplement: Supplementary file 1 [file 4f3e6d53270c6da30de00500.pdf]

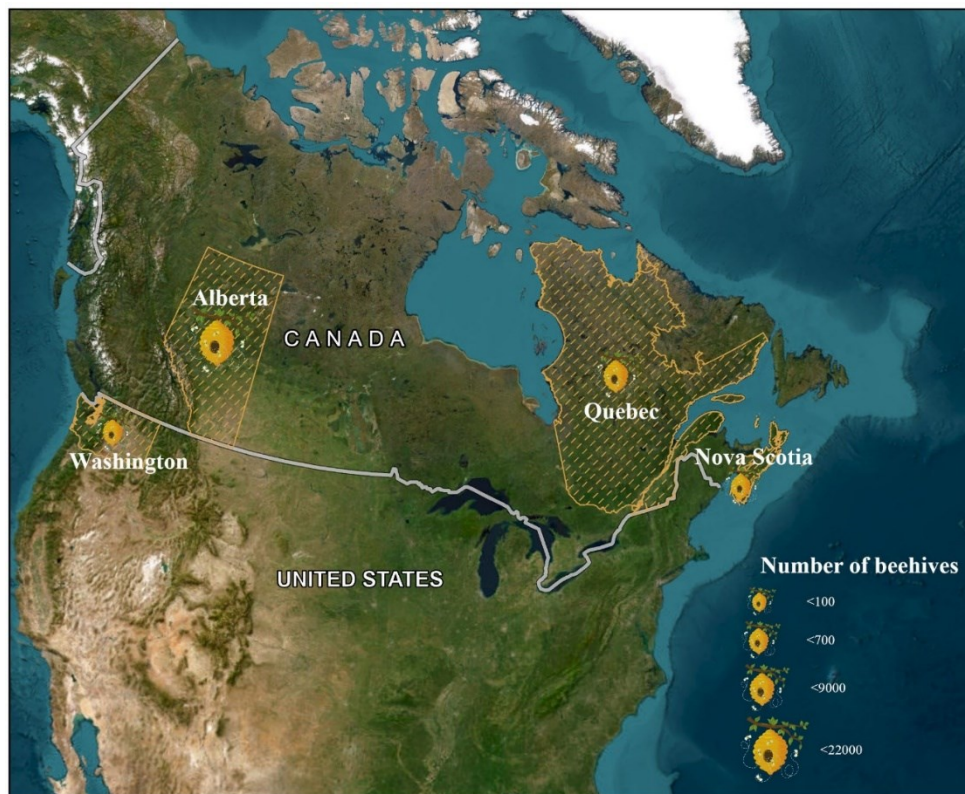

**Extended Data Fig. 1 | Map of the observations data.** The dataset of the operations was retrieved from a subset of anonymised data of the Nectar company.

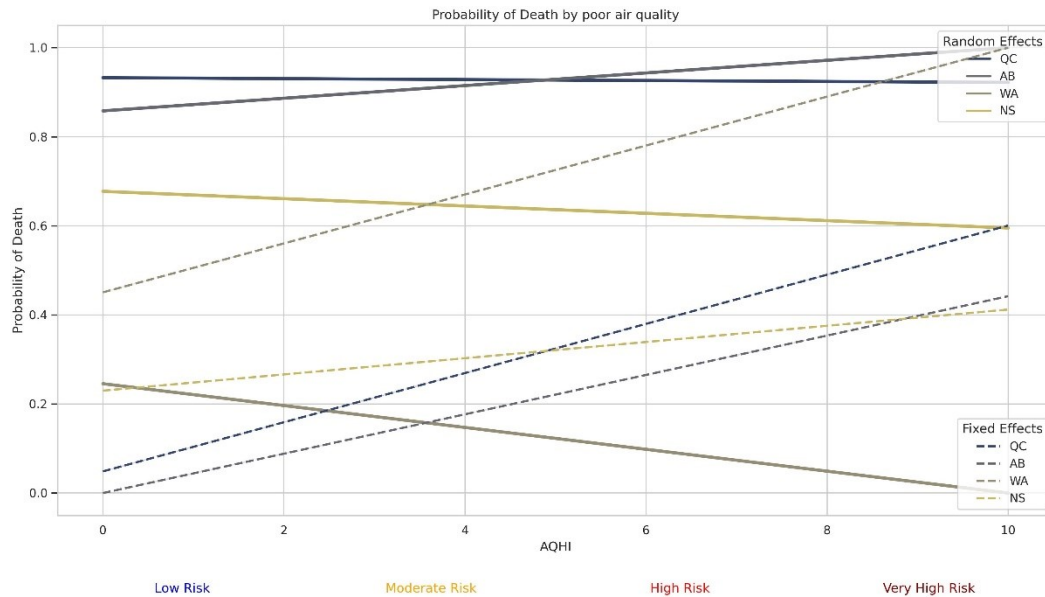

**Extended Data Fig. 2 | Reaction norm for each region.** As we allow the intercept and slope to vary in function of the region, we check here the mixed effect of the model, showing a different pattern for each region.

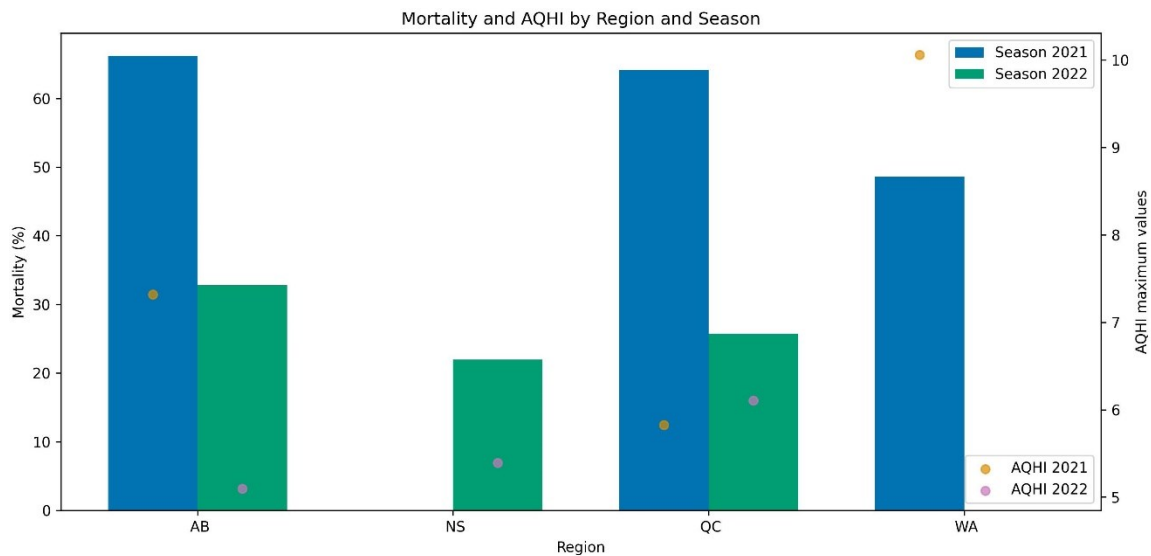

**Extended Data Fig. 3 | Honey bee hives mortality, air quality index showed by region and season.** The regions analysed were Alberta; AB, Nova Scotia; NS, Québec; QC, and Washington; WA.

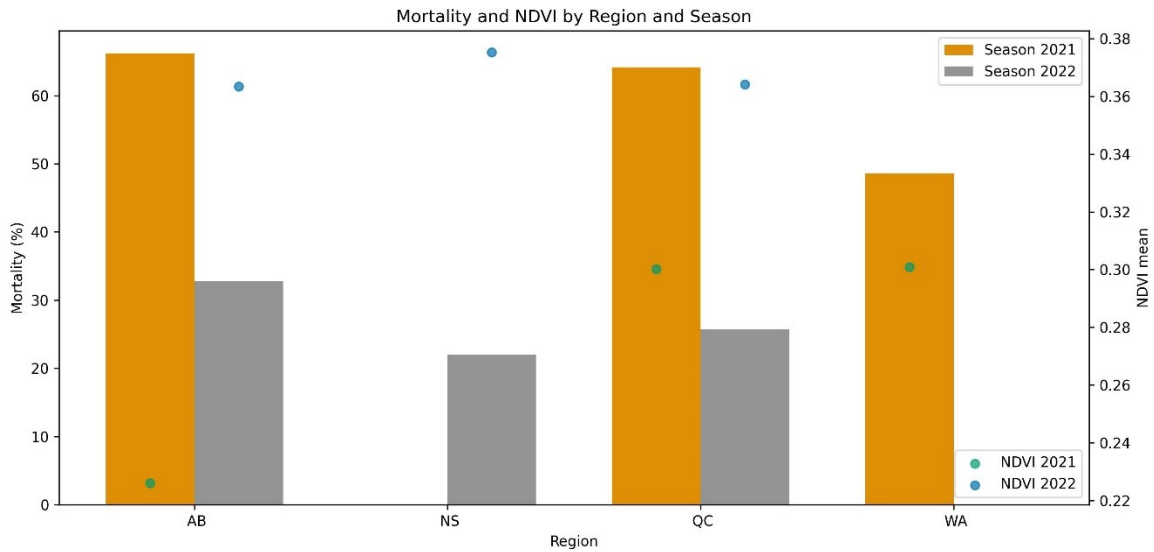

**Extended Data Fig. 4 | The mortality of Honey bee hives and vegetation index showed by region and season.** The regions analysed were Alberta; AB, Nova Scotia; NS, Québec; QC, and Washington; WA.

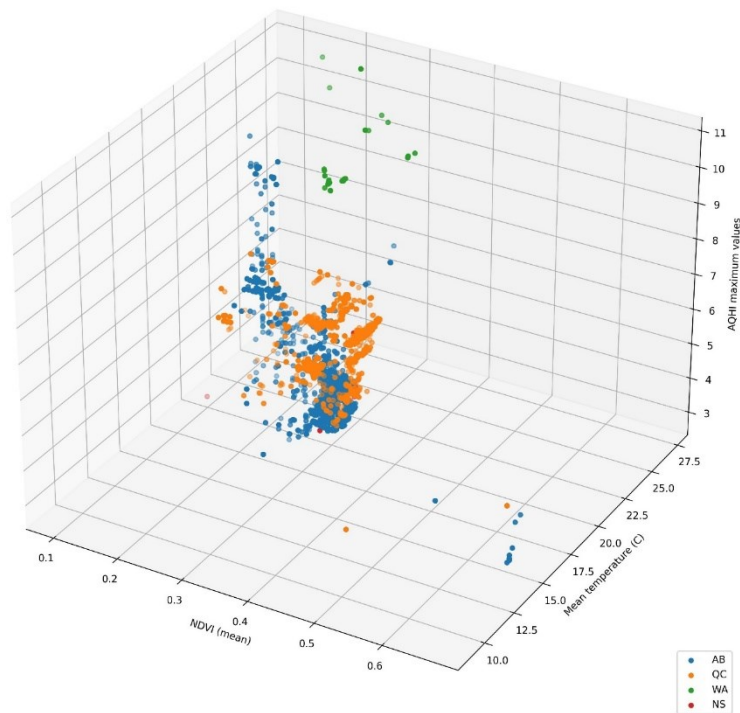

**Extended Data Fig. 5 | Honey bee hive mortality is shown by the relationship between the vegetation, air quality index, and the mean temperature in the regions.** The regions analysed were Alberta; AB, Nova Scotia; NS, Québec; QC, and Washington; WA.

**Extended Data Fig. 6 | AUC for prediction model applied to the honey bee hives dataset.**

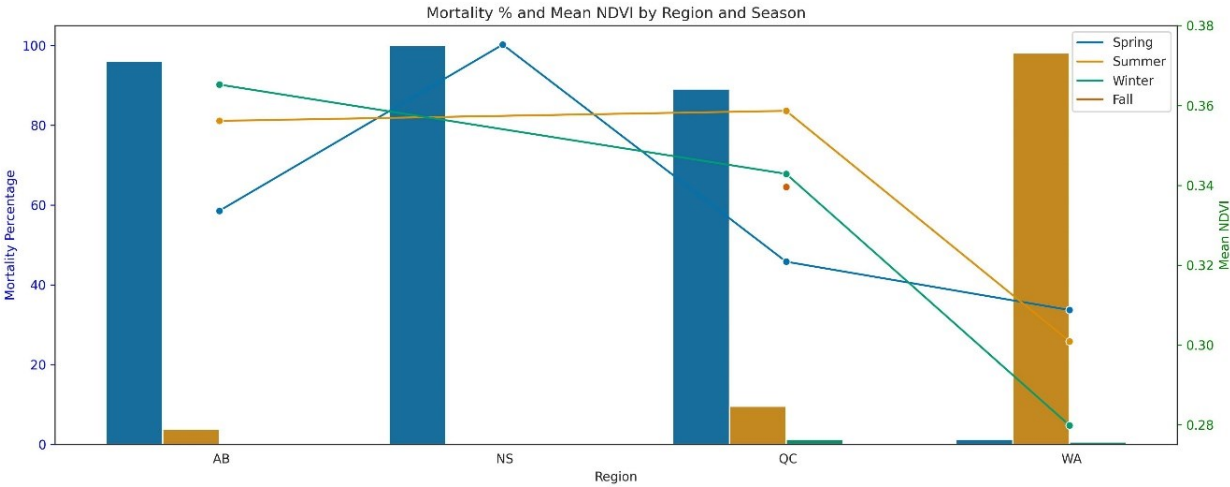

**Extended Data Fig. 7 | Analysis of mortality by region considering the seasonality and the available resources.** The regions analysed were Alberta; AB, Nova Scotia; NS, Québec; QC, and Washington; WA.

**Extended Data Table 1 | Linear Mixed Models comparison**

| Model | AIC       | Convergence | Model | AIC              | Convergence |
|-------|-----------|-------------|-------|------------------|-------------|
| 1     | 41285.987 | Yes         | 19    | 37494.264        | No          |
| 2     | 40122.505 | Yes         | 20    | 38295.424        | No          |
| 3     | 40234.904 | No          | 21    | 38525.971        | Yes         |
| 4     | 40122.505 | Yes         | 22    | 38397.437        | No          |
| 5     | 39848.31  | No          | 23    | 38872.01         | Yes         |
| 6     | 39840.602 | Yes         | 24    | 38650.075        | No          |
| 7     | 40240.803 | No          | 25    | 38775.158        | Yes         |
| 8     | 39960.754 | Yes         | 26    | 38855.786        | Yes         |
| 9     | 40024.883 | No          | 27    | 38473.078        | Yes         |
| 10    | 39985.941 | No          | 28    | 38474.123        | Yes         |
| 11    | 39828.806 | No          | 29    | 38587.796        | Yes         |
| 12    | 38612.395 | Yes         | 30    | 38553.031        | Yes         |
| 13    | 39868.089 | Yes         | 31    | 38438.567        | Yes         |
| 14    | 39855.92  | Yes         | 32    | 38434.13         | No          |
| 15    | 40126.958 | Yes         | 33    | <b>38394.665</b> | Yes         |
| 16    | 39785.363 | No          | 34    | 39828.806        | No          |

|    |           |     |    |           |    |
|----|-----------|-----|----|-----------|----|
| 17 | 38549.145 | Yes | 35 | 38330.505 | No |
| 18 | 38603.699 | Yes |    |           |    |

---

Results from the linear mixed models using the seasonal data 2021-2022 for the provinces of Quebec, Alberta, Nova Scotia, and the state of Washington. Number of observations: 318282. Note that we finally used model 33 because it was the model with the lowest AIC, and we were interested in understanding the effect of each environmental variable on the beehive mortality, including the random effects that the air quality can have over the different beehive locations.

---

591
